# Supplementary material for: iTRAQ Proteomic Analysis of Interactions Between 20E and Phospholipase C in Apolygus lucorum (Meyer-Dür)
Source: Front Physiol. 2022 Feb 18;13:845087. doi: 10.3389/fphys.2022.845087 (PMC8894726; doi:10.3389/fphys.2022.845087)
Supplement: Supplementary file 2 [file Data_Sheet_2.xlsx]

## Sheet: 3 groups
The shared DEPs among 20E/Control, U73122/Control, and (20E+U73122)/Control groups
Accession	GI Number	Refseq ID	Protein name	Sequence Length	Blast Similarity Mean	Species	Peptides(95%)	Ratio(average)-20E/Control	Ratio(average)-U73122/Control	Ratio(average)-(20U+U73122)/Control
Unigene11235_All	57791230	AAW56445.1	pathogenesis-related protein 5-like	248	0.7205	Lysiphlebus testaceipes	12	3.25142	0.273366	0.148504
CL301.Contig3_All	94421564	ABF18889.1	cathepsin L1	314	0.7151	Lygus lineolaris	5	0.236878	0.155949	0.238477
CL961.Contig2_All	146285356	ABQ18255.1	protein takeout (Haemolymph juvenile hormone binding protein)	256	0.4797	Lygus lineolaris	14	0.419575	0.265505	0.164263
CL1913.Contig1_All	282158103	NP_001164095.1	ATP-dependent RNA helicase p62-like	549	0.9266	Tribolium castaneum	15	0.302254	0.291084	0.178347
Unigene44049_All	328698158	XP_003240563.1	cuticle protein 19.8	315	0.8979	Acyrthosiphon pisum	55	2.15521	0.184463	0.287958
Unigene288_All	71413651	XP_808957.1	trans-sialidase	1446	0.8744	Trypanosoma cruzi strain CL Brener	2	2.06432	0.358738	0.426693
CL1466.Contig2_All	189234381	XP_967474.2	larval cuticle protein A2B-like	363	0.9512	Tribolium castaneum	293	2.78056	0.0940188	0.0454851
CL470.Contig1_All	91083957	XP_975021.1	myosin-9 isoform X1	352	0.8656	Tribolium castaneum	5	0.499937	0.316427	0.268951
	242010242	XP_002425879.1	Ras-related protein 1(Rap1)
	119888032	ABM05967.1	guanine nucleotide-binding protein G(I)/G(S)/G(T) subunit beta-1
	57791230	AAW56445.1	pathogenesis-related protein 5-like
	328698158	XP_003240563.1	cuticle protein 19.8
	71413651	XP_808957.1	trans-sialidase
	189234381	XP_967474.2	larval cuticle protein A2B-like

## Sheet: 20E ∩ U73122
The shared DEPs between 20E/Control and U73122/Control groups
Accession	GI Number	Refseq ID	Protein name	Sequence Length	Blast Similarity Mean	Species	Peptides(95%)	Ratio(average)-20E/Control	Ratio(average)-U73122/Control
Unigene4218_All	91081319	XP_969902.1	electron transfer flavoprotein-ubiquinone oxidoreductase, mitochondrial	601	0.9007	Tribolium castaneum	2	3.55269	2.50249
Unigene11235_All	57791230	AAW56445.1	pathogenesis-related protein 5-like	248	0.7205	Lysiphlebus testaceipes	12	3.25142	0.273366
CL1466.Contig2_All	189234381	XP_967474.2	larval cuticle protein A2B-like	363	0.9512	Tribolium castaneum	293	2.78056	0.0940188
CL1977.Contig2_All	194440585	BAG65665.1	ATP-dependent RNA helicase vasa	650	0.8465	Gryllus bimaculatus	3	2.42195	2.18439
Unigene44049_All	328698158	XP_003240563.1	cuticle protein 19.8	315	0.8979	Acyrthosiphon pisum	55	2.15521	0.184463
Unigene21019_All	270004992	EFA01440.1	hypothetical protein TcasGA2_TC030701, partial [Tribolium castaneum]	18024		Tribolium castaneum	6	2.08237	3.67252
Unigene288_All	71413651	XP_808957.1	trans-sialidase	1446	0.8744	Trypanosoma cruzi strain CL Brener	2	2.06432	0.358738
Unigene7707_All	307188535	EFN73271.1	proline-rich protein 4-like	404	0.9696	Camponotus floridanus	119	2.0532	0.275755
CL470.Contig1_All	91083957	XP_975021.1	myosin-9 isoform X1	352	0.8656	Tribolium castaneum	5	0.499937	0.316427
CL961.Contig2_All	146285356	ABQ18255.1	protein takeout (Haemolymph juvenile hormone binding protein)	256	0.4797	Lygus lineolaris	14	0.419575	0.265505
Unigene1903_All	91093256	XP_970626.1	60S ribosomal protein L30	116	0.9751	Tribolium castaneum	7	0.417997	2.68514
Unigene5845_All	357617387	EHJ70763.1	isocitrate dehydrogenase [NADP] cytoplasmic	408	0.9764	Danaus plexippus	13	0.398835	3.02934
Unigene18924_All	328705811	XP_001947916.2	ATP-binding cassette sub-family A member 3-like	1747	0.9062	Acyrthosiphon pisum	7	0.370163	0.111513
CL5411.Contig2_All	160947858	ABX54738.1	60S ribosomal protein L10	219	0.9883	Spodoptera exigua	4	0.345202	2.32188
Unigene8702_All	54039367	Q962R6.3	40S ribosomal protein S13	151	0.9772	Spodoptera frugiperda	6	0.323197	2.92376
CL1913.Contig1_All	282158103	NP_001164095.1	ATP-dependent RNA helicase p62-like	549	0.9266	Tribolium castaneum	15	0.302254	0.291084
Unigene13066_All	237681149	NP_001153721.1	ATP-dependent RNA helicase bel	699	0.8322	Tribolium castaneum	6	0.293897	0.469094
CL301.Contig3_All	94421564	ABF18889.1	cathepsin L1	314	0.7151	Lygus lineolaris	5	0.236878	0.155949
Unigene8888_All	70909845	CAJ17409.1	60S ribosomal protein L31	124	0.9734	Curculio glandium	3	0.228302	2.74056
Unigene20434_All	264667389	ACY71280.1	40S ribosomal protein S7	190	0.9639	Chrysomela tremula	7	0.166453	2.06118

## Sheet: 20E ∩ (20E+U73122)
The shared DEPs between 20E/Control and (20E+U73122)/Control groups
Accession	GI Number	Refseq ID	Protein name	Sequence Length	Blast Similarity Mean	Species	Peptides(95%)	Ratio(average)-20E/Control	Ratio(average)-(20E+U73122)/Control
Unigene11235_All	57791230	AAW56445.1	pathogenesis-related protein 5-like	248	0.7205	Lysiphlebus testaceipes	12	3.25142	0.148504
CL301.Contig3_All	94421564	ABF18889.1	cathepsin L1	314	0.7151	Lygus lineolaris	5	0.236878	0.238477
CL961.Contig2_All	146285356	ABQ18255.1	protein takeout (Haemolymph juvenile hormone binding protein)	256	0.4797	Lygus lineolaris	14	0.419575	0.164263
Unigene19994_All	263173498	ACY69955.1	uncharacterized protein LOC106673921 isoform X4	245	0.6061	Cimex lectularius	13	0.264491	0.349537
Unigene23097_All	263173507	ACY69957.1	40S ribosomal protein S16	153	0.9602	Cimex lectularius	3	0.424229	2.43223
Unigene11322_All	321472274	EFX83244.1	prefoldin subunit 1	124	0.7962	Daphnia pulex	3	0.408941	0.346795
CL1913.Contig1_All	282158103	NP_001164095.1	ATP-dependent RNA helicase p62-like	549	0.9266	Tribolium castaneum	15	0.302254	0.178347
Unigene13037_All	157121051	XP_001653750.1	enolase	433	0.9298	Aedes aegypti	23	0.475299	2.01697
Unigene22487_All	195572499	XP_002104233.1	transketolase-like protein 2	626	0.9837	Drosophila simulans	22	0.366101	2.42473
CL2032.Contig2_All	242007443	XP_002424549.1	nucleoprotein TPR isoform X1	2452	0.5991	Pediculus humanus corporis	7	0.48842	0.465355
CL1517.Contig1_All	242009369	XP_002425460.1	60S ribosomal protein L12	165	0.9467	Pediculus humanus corporis	7	0.41539	0.429351
Unigene16285_All	242010244	XP_002425880.1	titin, putative [Pediculus humanus corporis]	8829		Pediculus humanus corporis	3	2.12216	6.55287
Unigene22681_All	242013551	XP_002427468.1	4-aminobutyrate aminotransferase, mitochondrial	479	0.8344	Pediculus humanus corporis	9	0.491415	2.26786
Unigene44049_All	328698158	XP_003240563.1	cuticle protein 19.8	315	0.8979	Acyrthosiphon pisum	55	2.15521	0.287958
Unigene288_All	71413651	XP_808957.1	trans-sialidase	1446	0.8744	Trypanosoma cruzi strain CL Brener	2	2.06432	0.426693
CL1466.Contig2_All	189234381	XP_967474.2	larval cuticle protein A2B-like	363	0.9512	Tribolium castaneum	293	2.78056	0.0454851
Unigene5331_All	91091270	XP_969358.1	putative aminopeptidase W07G4.4	515	0.7827	Tribolium castaneum	34	0.406605	2.26786
CL470.Contig1_All	91083957	XP_975021.1	myosin-9 isoform X1	352	0.8656	Tribolium castaneum	5	0.499937	0.268951

## Sheet: U73122 ∩ (20E+U73122)
The shared DEPs between U73122/Control and (20E+U73122)/Control groups
Accession	GI Number	Refseq ID	Protein name	Sequence Length	Blast Similarity Mean	Species	Peptides(95%)	Ratio(average)-U73122/Control	Ratio(average)-(20E+U73122)/Control
CL5555.Contig4_All	242010242	XP_002425879.1	ras-like protein 3	184	0.984	Pediculus humanus corporis	2	9.20605	8.96732
Unigene4342_All	149689084	ABR27873.1	60S ribosomal protein L8	258	0.9886	Triatoma infestans	12	7.4308	7.61185
Unigene4161_All	149898895	ABR27949.1	40S ribosomal protein S20	117	0.9366	Triatoma infestans	4	6.31094	5.58185
CL4869.Contig1_All	380021554	XP_003694628.1	nidogen-2 isoform X3	1318	0.9347	Apis florea	23	4.01169	3.54236
CL1776.Contig2_All	70909601	CAJ17226.1	60S ribosomal protein L3	410	0.9675	Scarabaeus laticollis	5	3.375	3.36144
Unigene3690_All	340726402	XP_003401548.1	high mobility group protein HMGI-C	117	0.9367	Bombus terrestris	4	3.22121	2.29983
Unigene8590_All	321476546	EFX87506.1	T-complex protein 1 subunit zeta	530	0.8971	Daphnia pulex	3	2.85272	3.547
CL4105.Contig1_All	269859258	ACZ52196.1	heat shock protein 68-like	652	0.9555	Bemisia tabaci	23	2.50355	2.35545
CL6834.Contig1_All	383849519	XP_003700392.1	muscle M-line assembly protein unc-89	5668	0.9181	Megachile rotundata	7	2.39924	2.52724
Unigene18192_All	328710146	XP_003244179.1	PREDICTED: twitchin-like [Acyrthosiphon pisum]	8645		Acyrthosiphon pisum	5	2.34425	3.35637
CL6225.Contig2_All	46561738	AAT01074.1	arginine kinase isoform X2	356	0.9576	Homalodisca vitripennis	61	2.03846	3.30201
Unigene18543_All	315258620	BAJ46211.1	carboxypeptidase D	617	0.7789	Acyrthosiphon pisum	9	0.496624	0.262579
CL165.Contig2_All	307183175	EFN70084.1	DEAD-box ATP-dependent RNA helicase 20-like	705	0.9123	Camponotus floridanus	9	0.494567	0.481987
Unigene17597_All	343978787	AEM76722.1	cathepsin L1	330	0.7656	Triatoma brasiliensis	2	0.487529	0.401816
Unigene44886_All	328705520	XP_001950735.2	leucine-rich repeat extensin-like protein 1	333	0.757	Acyrthosiphon pisum	54	0.486776	0.375457
Unigene5925_All	332376793	AEE63536.1	FK506-binding protein 2	216	0.9002	Dendroctonus ponderosae	31	0.477983	0.332051
CL5644.Contig2_All	347965777	XP_321764.5	serpin B13	577	0.6288	Anopheles gambiae str. PEST	8	0.474242	0.360371
CL5211.Contig2_All	342905908	AEL79237.1	40S ribosomal protein S21	83	0.9124	Rhodnius prolixus	9	0.47364	0.369198
Unigene13548_All	328709074	XP_003243865.1	tubulin alpha-1A chain	450	0.9939	Acyrthosiphon pisum	4	0.468574	0.494153
Unigene15565_All	90820008	ABD98761.1	probable elongation factor 1-delta isoform X2	269	0.7362	Graphocephala atropunctata	5	0.468042	0.462277
CL3174.Contig4_All	121543927	ABM55628.1	tumor protein D54 isoform X3	211	0.7835	Maconellicoccus hirsutus	9	0.459592	0.470074
Unigene18101_All	242025305	XP_002433066.1	RNA-binding protein Rsf1-like	216	0.8727	Pediculus humanus corporis	2	0.450893	0.320251
CL429.Contig2_All	328778804	XP_624305.2	SH3 domain-binding glutamic acid-rich protein homolog	192	0.9127	Apis mellifera	7	0.441397	0.394524
Unigene12255_All	91094107	XP_967469.1	epidermal growth factor receptor substrate 15-like 1 isoform X1	926	0.7958	Tribolium castaneum	2	0.433262	0.435036
Unigene2477_All	195124321	XP_002006642.1	uncharacterized protein Dmoj_GI18471	781	0.8984	Drosophila mojavensis	2	0.42045	0.240535
Unigene14803_All	307188434	EFN73191.1	E3 ubiquitin-protein ligase KCMF1-like	616	0.8763	Camponotus floridanus	2	0.416306	0.0727507
Unigene11953_All	328724727	XP_001948545.2	mucin-5AC-like isoform X2	919	0.8426	Acyrthosiphon pisum	18	0.409286	0.316297
CL677.Contig14_All	242247181	NP_001156347.1	PDZ and LIM domain protein 3 isoform X1	236	0.9025	Acyrthosiphon pisum	10	0.406204	0.235158
Unigene12071_All	307095040	ADN29826.1	cuticle protein 21-like	231	0.9729	Triatoma matogrossensis	569	0.405526	0.352297
CL2219.Contig9_All	380018457	XP_003693144.1	protein couch potato isoform X1	331	0.9929	Apis florea	3	0.402217	0.35863
Unigene7433_All	307171865	EFN63520.1	mucin-19-like isoform X1	2281	0.792	Camponotus floridanus	52	0.386428	0.407812
Unigene42873_All	312385073	EFR29656.1	signal transducer and activator of transcription A-like	542	0.6743	Anopheles darlingi	2	0.385679	0.465985
Unigene4962_All	242023622	XP_002432231.1	UV excision repair protein RAD23 homolog B	344	0.7201	Pediculus humanus corporis	18	0.383182	0.236816
Unigene279_All	332017463	EGI58186.1	kinesin heavy chain isoform X2	969	0.9969	Acromyrmex echinatior	3	0.378523	0.1907
CL677.Contig7_All	91082237	XP_967133.1	PDZ and LIM domain protein 3 isoform X2	362	0.8536	Tribolium castaneum	22	0.377544	0.341851
Unigene4068_All	357604796	EHJ64324.1	bolA-like protein DDB_G0274169	109	0.9288	Danaus plexippus	4	0.37667	0.217082
Unigene21932_All	170034700	XP_001845211.1	electron transfer flavoprotein subunit alpha, mitochondrial	329	0.9073	Culex quinquefasciatus	37	0.361157	0.326813
Unigene11194_All	349592318	AEP95757.1	ejaculatory bulb-specific protein 3-like	130	0.8399	Apolygus lucorum	4	0.360329	0.102793
Unigene288_All	71413651	XP_808957.1	trans-sialidase	1446	0.8744	Trypanosoma cruzi strain CL Brener	2	0.358738	0.426693
Unigene19422_All	321473343	EFX84311.1	---NA---	367		Daphnia pulex	3	0.351513	0.387224
Unigene22393_All	193652401	XP_001951879.1	chitin deacetylase 4 precursor	479	0.9013	Acyrthosiphon pisum	4	0.351407	0.425773
Unigene7125_All	355428304	AER92468.1	endothelial differentiation-related factor 1 homolog	145	0.8883	Triatoma rubida	2	0.347638	0.291719
Unigene4927_All	91076110	XP_969015.1	synapse-associated protein of 47 kDa isoform X3	432	0.8538	Tribolium castaneum	3	0.346795	0.353534
Unigene4421_All	328792166	XP_623555.2	nascent polypeptide-associated complex subunit alpha	241	0.9708	Apis mellifera	23	0.344052	0.243583
CL758.Contig2_All	328702815	XP_001945177.2	protein piccolo isoform X1	1651	0.7693	Acyrthosiphon pisum	3	0.342613	0.124835
CL66.Contig1_All	91091988	XP_967302.1	26S proteasome non-ATPase regulatory subunit 4 isoform X1	381	0.9185	Tribolium castaneum	5	0.342012	0.438834
Unigene19937_All	226442061	ACO57620.1	alpha-crystallin A chain isoform X2	190	0.9518	Pteromalus puparum	35	0.338447	0.396159
Unigene4574_All	149689072	ABR27860.1	muscle-specific protein 20	184	0.9193	Triatoma infestans	12	0.332591	0.287288
Unigene17722_All	170071155	XP_001869825.1	conserved hypothetical protein	373	0.6994	Culex quinquefasciatus	27	0.329224	0.237724
Unigene13433_All	242004943	XP_002423335.1	MICOS complex subunit MIC13 homolog QIL1	132	0.6507	Pediculus humanus corporis	3	0.329014	0.380515
Unigene19066_All	157131433	XP_001662246.1	PAX-interacting protein 1	564	0.6121	Aedes aegypti	30	0.328392	0.263817
Unigene8873_All	263173427	ACY69939.1	ubiquitin-fold modifier 1	89	0.9572	Cimex lectularius	8	0.327075	0.426258
Unigene6474_All	49036806	AAT48984.1	cathepsin B	331	0.7548	Triatoma sordida	16	0.326619	0.124427
Unigene7913_All	380026487	XP_003696983.1	nuclear pore complex protein Nup50	514	0.8622	Apis florea	3	0.323453	0.233163
Unigene13997_All	121583754	NP_001073569.1	protein obstructor-E isoform X1	274	0.9325	Tribolium castaneum	101	0.318904	0.475296
CL470.Contig1_All	91083957	XP_975021.1	myosin-9 isoform X1	352	0.8656	Tribolium castaneum	5	0.316427	0.268951
Unigene21258_All	383853168	XP_003702095.1	protein lingerer isoform X1	1085	0.8899	Megachile rotundata	17	0.314262	0.219528
Unigene11208_All	94469022	ABF18360.1	uncharacterized protein LOC5576103	103	0.8011	Aedes aegypti	2	0.313457	0.30378
CL896.Contig6_All	328724506	XP_001951692.2	furin-like protease 2	1235	0.9263	Acyrthosiphon pisum	8	0.312605	0.343791
Unigene14225_All	328710996	XP_001943701.2	calponin homology domain-containing protein DDB_G0272472-like isoform X1	2052	0.8572	Acyrthosiphon pisum	7	0.309547	0.328116
CL7068.Contig2_All	345496803	XP_003427819.1	cleavage stimulation factor subunit 2 isoform X1	425	0.9305	Nasonia vitripennis	7	0.301759	0.432299
CL6055.Contig1_All	145098373	ABD63920.1	glycoside hydrolase family 28 protein	356	0.6308	Lygus lineolaris	7	0.301014	0.312073
Unigene4208_All	350413716	XP_003490086.1	Na(+)/H(+) exchange regulatory cofactor NHE-RF1	256	0.8374	Bombus impatiens	7	0.295956	0.267492
CL1221.Contig1_All	327268872	XP_003219219.1	protein TFG isoform X1	400	0.9757	Anolis carolinensis	2	0.29331	0.403992
CL6876.Contig1_All	383865675	XP_003708298.1	BAG domain-containing protein Samui isoform X1	749	0.76	Megachile rotundata	6	0.292376	0.338454
CL1913.Contig1_All	282158103	NP_001164095.1	ATP-dependent RNA helicase p62-like	549	0.9266	Tribolium castaneum	15	0.291084	0.178347
CL27.Contig1_All	170034090	XP_001844908.1	fibroin heavy chain	701	0.762	Culex quinquefasciatus	34	0.284828	0.33079
Unigene22042_All	48138800	XP_396933.1	plancitoxin-1	375	0.843	Apis mellifera	12	0.284232	0.270455
Unigene18625_All	242018020	XP_002429481.1	protein obstructor-E-like	529	0.8554	Pediculus humanus corporis	14	0.283595	0.300763
CL3445.Contig2_All	328790639	XP_001120078.2	eukaryotic translation initiation factor 4E-binding protein 2	143	0.8971	Apis mellifera	4	0.277947	0.281178
CL2759.Contig3_All	321470476	EFX81452.1	ubiquilin-1	562	0.7139	Daphnia pulex	9	0.276733	0.188559
Unigene39278_All	332021481	EGI61846.1	protein split ends isoform X1	1335	0.8498	Acromyrmex echinatior	8	0.273716	0.170678
Unigene11235_All	57791230	AAW56445.1	pathogenesis-related protein 5-like	248	0.7205	Lysiphlebus testaceipes	12	0.273366	0.148504
CL224.Contig5_All	157119197	XP_001653296.1	TPPP family protein CG45057 isoform X2	236	0.832	Aedes aegypti	5	0.273167	0.31574
CL1002.Contig1_All	270001833	EEZ98280.1	larval cuticle protein A2B-like	185	0.9532	Tribolium castaneum	487	0.273017	0.41866
Unigene44898_All	270001832	EEZ98279.1	larval cuticle protein A2B-like	149	0.9372	Tribolium castaneum	548	0.272292	0.215364
Unigene15266_All	241997984	XP_002433635.1	NSFL1 cofactor p47	379	0.6697	Ixodes scapularis	12	0.271929	0.174517
Unigene2955_All	6448469	BAA86911.1	digestive cysteine proteinase 1	552	0.8391	Periplaneta americana	12	0.271454	0.304402
Unigene22518_All	189238225	XP_970862.2	nuclear autoantigenic sperm protein isoform X3	349	0.6454	Tribolium castaneum	8	0.270126	0.420493
CL3778.Contig1_All	118387725	XP_001026965.1	hypothetical protein TTHERM_00688630	812	1	Tetrahymena thermophila	7	0.268086	0.250001
Unigene2353_All	146285356	ABQ18255.1	protein takeout (Haemolymph juvenile hormone binding protein)	256	0.4797	Lygus lineolaris	14	0.265505	0.164263
CL4644.Contig2_All	195475132	XP_002089838.1	late embryogenesis abundant protein ECP63 isoform X2	230	0.9741	Drosophila yakuba	3	0.263741	0.281069
CL2761.Contig2_All	242011784	XP_002426626.1	proteoglycan 4	1364	0.8171	Pediculus humanus corporis	2	0.261683	0.454993
Unigene15150_All	146285353	ABQ18254.1	---NA---	239		Lygus lineolaris	7	0.261517	0.183662
CL861.Contig4_All	242009763	XP_002425652.1	protein PRRC2C-like isoform X1	2365	0.5629	Pediculus humanus corporis	12	0.261189	0.223307
Unigene20649_All	357612388	EHJ67958.1	TRAF3-interacting protein 1	601	0.7723	Danaus plexippus	5	0.259905	0.311139
CL6592.Contig2_All	91087021	XP_974228.1	peptidyl-prolyl cis-trans isomerase NIMA-interacting 4	128	0.9807	Tribolium castaneum	2	0.25495	0.200722
CL2833.Contig2_All	380028007	XP_003697703.1	la-related protein 4 isoform X1	861	0.987	Apis florea	4	0.252104	0.190995
Unigene14919_All	345485341	XP_003425247.1	gametocyte-specific factor 1 homolog	496	0.5743	Nasonia vitripennis	4	0.250244	0.272874
Unigene22910_All	270004133	EFA00581.1	nuclear pore complex protein Nup153	1409	0.556	Tribolium castaneum	2	0.243232	0.294017
Unigene14989_All	158300275	XP_320240.4	N(4)-(Beta-N-acetylglucosaminyl)-L-asparaginase-like	361	0.7455	Anopheles gambiae str. PEST	11	0.242235	0.386026
Unigene11324_All	380013882	XP_003690974.1	titin homolog	3241	0.8473	Apis florea	2	0.240569	0.239935
Unigene50_All	91083529	XP_973151.1	serine-rich adhesin for platelets-like	1531	0.7873	Tribolium castaneum	4	0.238302	0.239572
CL1043.Contig2_All	356491463	CBZ40972.1	---NA---	1450		Leishmania mexicana MHOM/GT/2001/U1103	6	0.237475	0.0868611
Unigene18297_All	158289373	XP_311111.4	histidine-rich protein PFHRP-II	354	0.6352	Anopheles gambiae str. PEST	328	0.236241	0.124939
CL6298.Contig2_All	345490748	XP_003426447.1	proteoglycan 4-like isoform X2	1381	0.7784	Nasonia vitripennis	7	0.235595	0.262671
Unigene24148_All	328700996	XP_001951906.2	pathogenesis-related protein 5-like	388	0.7801	Acyrthosiphon pisum	4	0.234054	0.100514
Unigene44422_All	270007895	EFA04343.1	PREDICTED: uncharacterized protein LOC100142362 isoform X2	236	0.8442	Tribolium castaneum	6	0.22973	0.239893
Unigene18646_All	307095022	ADN29817.1	venom serine protease-like	303	0.6052	Triatoma matogrossensis	17	0.229313	0.384745
Unigene13599_All	289597601	ADD12236.1	Theileria-specific sub-telomeric protein, SVSP family, putative	493	0.6045	Theileria annulata	5	0.225679	0.157502
Unigene21727_All	270014579	EFA11027.1	synapse-associated protein of 47 kDa isoform X2	405	0.8684	Tribolium castaneum	7	0.225268	0.166101
Unigene10138_All	2275132	CAA03880.1	cuticle protein 16.5-like	293	0.6854	Tenebrio molitor	374	0.224266	0.432274
Unigene4639_All	340718429	XP_003397670.1	putative peptidyl-prolyl cis-trans isomerase dodo	162	0.9839	Bombus terrestris	6	0.220088	0.188012
Unigene19528_All	193636713	XP_001949730.1	src substrate protein p85	629	0.8768	Acyrthosiphon pisum	4	0.218992	0.0772622
CL6985.Contig2_All	345498199	XP_003428176.1	flocculation protein FLO11	816	0.8423	Nasonia vitripennis	7	0.218429	0.297136
Unigene14210_All	125982379	XP_001355082.1	coiled-coil-helix-coiled-coil-helix domain-containing protein 2	161	0.9132	Drosophila pseudoobscura pseudoobscura	8	0.217105	0.0649053
Unigene19243_All	270007273	EFA03721.1	cuticle protein 8-like	223	0.9016	Tribolium castaneum	57	0.213135	0.194032
Unigene8163_All	321457688	EFX68769.1	alkaline nuclease	392	0.5293	Daphnia pulex	6	0.21285	0.472669
CL2290.Contig3_All	242012621	XP_002427028.1	serine protease inhibitor 3/4 isoform X1	696	0.6682	Pediculus humanus corporis	28	0.212358	0.181281
CL996.Contig2_All	350414279	XP_003490265.1	protein Gawky isoform X1	1991	0.9841	Bombus impatiens	5	0.210595	0.304372
CL6816.Contig2_All	242016703	XP_002428887.1	ras GTPase-activating protein-binding protein 2 isoform X1	506	0.6946	Pediculus humanus corporis	17	0.210559	0.277051
Unigene7460_All	193589558	XP_001945816.1	myb-like protein Q	402	0.8967	Acyrthosiphon pisum	18	0.206011	0.225057
Unigene6401_All	307182516	EFN69723.1	death-associated protein 1	103	0.9722	Camponotus floridanus	12	0.204031	0.163298
Unigene44585_All	270001354	EEZ97801.1	PREDICTED: uncharacterized protein LOC657400 isoform X1	697	0.9461	Tribolium castaneum	3	0.202362	0.487905
Unigene14855_All	198463339	XP_002135479.1	probable GPI-anchored adhesin-like protein PGA55 isoform X2	1997	0.8231	Drosophila pseudoobscura pseudoobscura	12	0.200579	0.129251
Unigene19609_All	357625105	EHJ75654.1	myophilin	188	0.9524	Danaus plexippus	16	0.198058	0.274055
CL1343.Contig2_All	149689076	ABR27867.1	thymosin beta isoform X2	169	0.8337	Triatoma infestans	6	0.196762	0.0902348
CL4924.Contig1_All	383860620	XP_003705787.1	digestive cysteine proteinase 1	549	0.9029	Megachile rotundata	19	0.190344	0.203751
CL3448.Contig2_All	189238744	XP_972178.2	far upstream element-binding protein 3 isoform X1	727	0.7061	Tribolium castaneum	40	0.188921	0.230673
Unigene4939_All	288869502	NP_001165858.1	protein obstructor-E-like	248	0.8564	Acyrthosiphon pisum	20	0.188641	0.291321
Unigene13953_All	123398947	XP_001301377.1	GABA-A receptor epsilon	365	0.7658	Trichomonas vaginalis G3	2	0.188489	0.136542
Unigene13702_All	158562470	ABW74141.1	cuticle protein 3	203	0.8307	Leptinotarsa decemlineata	14	0.184846	0.431248
Unigene44049_All	328698158	XP_003240563.1	cuticle protein 19.8	315	0.8979	Acyrthosiphon pisum	55	0.184463	0.287958
Unigene116_All	242009779	XP_002425660.1	ataxin-2 homolog isoform X1	908	0.7634	Pediculus humanus corporis	6	0.181516	0.242732
Unigene15694_All	27882093	AAH44517.1	cathepsin B-like	330	0.9281	Danio rerio	5	0.180036	0.22361
Unigene11934_All	33328237	AAQ09569.1	antifreeze glycoprotein precursor	666		Arctogadus glacialis	7	0.178717	0.244008
Unigene10457_All	281209094	EFA83269.1	perilipin-4-like isoform X4	456	0.4655	Polysphondylium pallidum PN500	10	0.176425	0.222401
CL3602.Contig1_All	242006466	XP_002424071.1	vegetative cell wall protein gp1-like	409	0.6929	Pediculus humanus corporis	24	0.172576	0.169223
CL2958.Contig2_All	328711583	XP_001947914.2	uncharacterized protein LOC100167481	319	0.6668	Acyrthosiphon pisum	2	0.170243	0.0869031
Unigene11660_All	380030684	XP_003698973.1	protein CDV3 homolog	216	0.8587	Apis florea	3	0.170042	0.2265
Unigene20087_All	380014284	XP_003691169.1	cathepsin L	345	0.9111	Apis florea	14	0.166409	0.166865
Unigene22088_All	156540958	XP_001601073.1	transcriptional regulator ATRX homolog isoform X1	247	0.8052	Nasonia vitripennis	9	0.164072	0.154069
Unigene14176_All	157361539	ABV44727.1	peroxiredoxin-5, mitochondrial	182	0.8527	Phlebotomus papatasi	33	0.160815	0.208746
CL301.Contig1_All	94421564	ABF18889.1	cathepsin L1	314	0.7151	Lygus lineolaris	30	0.155949	0.238477
CL2343.Contig3_All	189240451	XP_001812683.1	putative mediator of RNA polymerase II transcription subunit 26 isoform X1	2308	0.6986	Tribolium castaneum	11	0.155399	0.234927
CL3761.Contig2_All	340728972	XP_003402785.1	digestive cysteine proteinase 1	549	0.9192	Bombus terrestris	9	0.149973	0.0415487
CL1156.Contig1_All	350415565	XP_003490681.1	caprin homolog	659	0.9165	Bombus impatiens	13	0.147856	0.227875
Unigene11892_All	193610873	XP_001946484.1	protein piccolo	1602	0.8095	Acyrthosiphon pisum	9	0.13275	0.175233
Unigene14879_All	383849463	XP_003700364.1	transcription initiation factor IIA subunit 1 isoform X1	360	0.9003	Megachile rotundata	4	0.12765	0.246097
Unigene21602_All	242021421	XP_002431143.1	dihydropyrimidinase isoform X1	613	0.7508	Pediculus humanus corporis	2	0.127002	0.127531
CL4677.Contig1_All	345497898	XP_001606911.2	protein piccolo isoform X4	2272	0.7134	Nasonia vitripennis	4	0.126655	0.204437
CL2296.Contig1_All	350419691	XP_003492270.1	microtubule-associated protein Jupiter isoform X3	209	0.9006	Bombus impatiens	8	0.124835	0.151164
Unigene12471_All	307095192	ADN29902.1	neurofilament medium polypeptide-like	118	0.744	Triatoma matogrossensis	5	0.12186	0.100483
CL384.Contig1_All	345495717	XP_001606306.2	retinitis pigmentosa 1-like 1 protein isoform X2	853	0.9099	Nasonia vitripennis	4	0.118382	0.185971
Unigene19270_All	263173521	ACY69961.1	protein CDV3 homolog	171	0.6234	Cimex lectularius	2	0.117862	0.185994
Unigene8579_All	270002153	EEZ98600.1	skin secretory protein xP2-like	334	0.7386	Tribolium castaneum	29	0.110351	0.221736
Unigene4187_All	357625742	EHJ76082.1	---NA---	209		Danaus plexippus	25	0.108257	0.050411
Unigene44433_All	270010491	EFA06939.1	titin homolog	198	0.8058	Tribolium castaneum	8	0.107699	0.281413
CL2155.Contig3_All	239788988	BAH71144.1	outer dense fiber protein 3 isoform X1	251	0.8736	Acyrthosiphon pisum	20	0.10693	0.0555473
Unigene4661_All	307094980	ADN29796.1	multiple coagulation factor deficiency protein 2 homolog isoform X1	257	0.8475	Triatoma matogrossensis	5	0.101905	0.0714992
Unigene44311_All	242004118	XP_002422980.1	keratin, type II cytoskeletal 1 isoform X1	272	0.718	Pediculus humanus corporis	3	0.0980336	0.131009
Unigene44897_All	189234381	XP_967474.2	larval cuticle protein A2B-like	363	0.9489	Tribolium castaneum	608	0.0940188	0.0454851
CL1725.Contig3_All	170036903	XP_001846300.1	probable chitinase 10	1182	0.5878	Culex quinquefasciatus	9	0.0851147	0.0573288
Unigene7795_All	194320502	ACF48469.1	cathepsin L1	330	0.7528	Triatoma brasiliensis	15	0.0564066	0.0799335
Unigene994_All	123445462	XP_001311491.1	involucrin isoform X2	2086	0.6004	Trichomonas vaginalis G3	19	0.0454075	0.0285846
